# Supplementary material
Source: ML conference proceedings conference paper supplement (https://openaccess.thecvf.com/content/CVPR2026/html/Bozorgtabar_LATA_Laplacian-Assisted_Transductive_CVPR_2026_paper.html)
Supplement: Supplementary file 1 [file Bozorgtabar_LATA_Laplacian-Assisted_Transductive_CVPR_2026_supplemental.pdf]

# LATA: Laplacian-Assisted Transductive Adaptation for Conformal Uncertainty in Medical VLMs

Behzad Bozorgtabar<sup>1\*</sup> Dwarikanath Mahapatra<sup>2</sup> Sudipta Roy<sup>3</sup>  
Muzammal Naseer<sup>2</sup> Imran Razzak<sup>4</sup> Zongyuan Ge<sup>5</sup>

<sup>1</sup>Aarhus University, Denmark <sup>2</sup>Khalifa University, UAE <sup>3</sup>Jio University, India  
<sup>4</sup>MBZUAI, UAE <sup>5</sup>Monash University, Australia

\*behzad@ece.au.dk

## A. Algorithm of LATA

The end-to-end **LATA** procedure is summarized in Algorithm 1.

---

### Algorithm 1 LATA

---

**Inputs :** Frozen VLM  $(\phi, W)$ ; labeled calibration  $\mathcal{D}_{\text{cal}} = \{(x_i, y_i)\}_{i=1}^n$ ; unlabeled test  $\mathcal{D}_{\text{test}} = \{x_j\}_{j=1}^m$ ; frozen ViLU; error level  $\alpha$ ; nonconformity rule  $S_{\text{base}} \in \{\text{LAC, APS, RAPS}\}$ ; hyperparameters  $(k, \sigma, \gamma, T_{\text{iter}}, \lambda, \eta)$ ; optional prior  $(\beta, m)$ .

**Output:** Prediction sets  $\{\mathcal{C}(x_j)\}_{j=1}^m$ .

```

1  $\mathcal{U} \leftarrow \mathcal{D}_{\text{cal}} \cup \mathcal{D}_{\text{test}}$ ; // joint pool
2 foreach  $x \in \mathcal{U}$  do
3    $q(x) \leftarrow p(W, \phi(x))$ ; // Eq. (1); zero-shot probs,
    $q(x) \in \Delta^{C-1}$ 
; // Block 1: LATA (deterministic transductive refinement)
4 Build a symmetric  $k$ NN graph  $W^g$  on  $\{\phi(x)/\|\phi(x)\|_2 : x \in \mathcal{U}\}$  using union; weights via Gaussian kernel with bandwidth  $\sigma$ ; // Sec. 3.4
5 if  $\beta > 0$  then
6   foreach  $x \in \mathcal{U}$  do
7      $q(x) \leftarrow \text{Renorm}(q(x) \odot m^\beta)$ ; //  $[q_{ik} \leftarrow q_{ik} m_k^\beta / \sum_\ell q_{i\ell} m_\ell^\beta]$ 
8 Initialize  $\tilde{z}^{(0)}(x) \leftarrow q(x)$  for all  $x \in \mathcal{U}$  for  $t = 1$  to  $T_{\text{iter}}$  do
9   foreach  $x_i \in \mathcal{U}$  do
10    for  $c = 1$  to  $C$  do
11       $m_{ic} \leftarrow \sum_j W_{ij}^g \tilde{z}_{jc}^{(t-1)}$   $\tilde{z}_{ic}^{(t)} \leftarrow q_{ic} \exp(\gamma m_{ic})$ 
12       $\tilde{z}_i^{(t)} \leftarrow \tilde{z}_i^{(t)} / \sum_{c=1}^C \tilde{z}_{ic}^{(t)}$ ; // row-normalize
13 Set  $\tilde{z}(x) \leftarrow \tilde{z}^{(T_{\text{iter}})}(x)$  for all  $x \in \mathcal{U}$ ; // Eq. (6)
; // Block 2: Failure-aware conformal prediction
14 foreach  $x \in \mathcal{U}$  do
15    $(u(x), \alpha(x)) \leftarrow \text{ViLU}(x)$ ; // frozen head; identical on cal & test
16 for  $i = 1$  to  $n$  do
17    $s_i \leftarrow S_{\text{base}}(\tilde{z}(x_i), y_i) (1 + \lambda u(x_i)) - \eta \alpha_{y_i}(x_i)$ ; // Eq. (8)
18  $\hat{s} \leftarrow$  empirical  $(1 - \alpha)$  quantile of  $\{s_i\}_{i=1}^n$ ; // Eq. (2)
19 foreach  $x_j \in \mathcal{D}_{\text{test}}$  do
20    $\mathcal{C}(x_j) \leftarrow \{y \in \{1, \dots, C\} : S_{\text{base}}(\tilde{z}(x_j), y) (1 + \lambda u(x_j)) - \eta \alpha_y(x_j) \leq \hat{s}\}$ 
21 return  $\{\mathcal{C}(x_j)\}_{j=1}^m$ 

```

---

## B. Related Work

**Transfer learning in VLMs.** Foundation VLMs deliver strong zero-shot recognition, but performance can deteriorate when downstream concepts are under-represented during pretraining, motivating few-shot transfer. Popular strategies include *prompt learning* (optimizing task-specific textual tokens) [14, 17] and *black-box adapters*/linear probes that operate on frozen embeddings; the latter often yields competitive accuracy at lower compute by blending visual and text logits (e.g., constrained or text-informed probes such as CLAP [8] or LP++ [3]). While effective, these methods are typically *inductive*: they adapt from the labeled calibration split but do not exploit the unlabeled test distribution, and—when the same labels are reused for conformal calibration—can compromise exchangeability. Recent *transductive* black-box approaches (e.g., TransCLIP [16]) incorporate unlabeled test data via simple generative priors, improving accuracy but leaving coverage guarantees unaddressed. Our work departs from accuracy-only transfer by targeting *reliable* few-shot adaptation: **LATA** is label-free, training-free, and transductive, and we couple it with a failure-aware conformal score—preserving split-conformal validity while improving set efficiency and class-wise balance at fixed coverage.

**Conformal prediction with VLMs.** Conformal prediction (CP) [2, 12] provides finite-sample coverage guarantees; in vision, it is commonly used in its split form SCP [5, 13] with black-box models and standard nonconformity scores (LAC [7], APS [6], RAPS [1]). However, these methods rely on models trained under the assumption that the training and test data are independently and identically distributed (i.i.d.)—an assumption that does not hold for pre-trained VLMs, which are the focus of our work. Extending CP beyond image-only classifiers to VLMs is recent: Conf-OT [9] rebalances zero-shot logits via opti-

Table S1. **Complexity & compute profile.** Asymptotics in  $N=n+m$ ,  $C$ ,  $K$ ,  $d$ .

| Method      | Labels at transfer? | Training?    | Per-query refits | Dominant complexity                                      | Memory             | Time/img (s) <sup>†</sup> | SCP validity |
|-------------|---------------------|--------------|------------------|----------------------------------------------------------|--------------------|---------------------------|--------------|
| LATA (ours) | No                  | No           | None             | $O(N \log N \cdot d) + O(T_{\text{iter}} k N C) + O(nC)$ | $O(kN+NC)$         | <b>0.05–0.06</b>          | Yes          |
| SCA-T       | No                  | Yes (unsup.) | None             | $O(T'NC) + O(nC)$                                        | logits+buffers     | 1.04–1.15                 | Yes          |
| Conf-OT     | No                  | No           | None             | $O(SK(N+m)) + O(nC)$                                     | OT matrices        | 0.60–0.70                 | Yes          |
| FCA         | Yes (cal.)          | Yes          | $O(C)$           | $O(C \times \text{fit\_cost}) + O(nC)$                   | probe heads+logits | — (solver-dep.)           | Yes          |

<sup>†</sup>Measured on our setup (same backbone, prompts, hardware) and averaged over LAC/APS at  $\alpha=0.10$ .

mal transport before SCP, improving size but offering limited control of class-wise balance; FCA [11] performs full-conformal adaptation with labeled calibration data. To preserve exchangeability, it evaluates test queries via per-label refits—effectively  $O(C)$  gradient-based updates per query/window. This delivers strong accuracy and compact sets, but at the expense of heavy compute, higher latency, and a departure from the black-box setting; and SCA-T [10] regularizes predictions transductively on the unlabeled pool, improving coverage/efficiency without labels but without leveraging multimodal failure/plausibility cues. Our method differs by being *label-free*, *training-free*, and *black-box*: it smooths zero-shot probabilities over an image–image  $k$ NN graph built on the joint calibration and test pool and augments SCP with a vision–language uncertainty head for failure-aware scoring. The transform is deterministic and applied identically to both splits (preserving SCP validity), while delivering smaller sets and lower CCV at the desired coverage.

### C. Computational Complexity

In this section, we compare the computational profile of **LATA** against competitive baselines. Let  $n=|\mathcal{D}_{\text{cal}}|=C \times K$ , let  $m$  denote the number of test samples processed together, and let  $N=n+m$  be the joint pool size used for transductive refinement. Let  $d$  be the embedding dimension,  $k$  the  $k$ NN degree, and  $T_{\text{iter}}$  the number of mean-field (CCCP) [15] passes.

**LATA** is *training-free* and *label-free* at transfer time: it applies a deterministic refinement to the joint pool, then performs standard conformal prediction over all  $C$  classes. This preserves exchangeability and SCP validity while enabling transductive adaptation.

#### Complexity of LATA:

- **Graph build:** approximate  $k$ NN on  $\ell_2$ -normalized embeddings:  $O(N \log N \cdot d)$  time;  $O(kN)$  memory.
- **LATA updates (mean-field / CCCP):** sparse neighbor aggregation over all  $C$  labels:  $O(T_{\text{iter}} k N C)$  time;  $O(kN+NC)$  memory; no backprop.
- **Failure-aware head:** lightweight per-sample forward over  $C$  labels:  $O(NC)$  time;  $O(NC)$  memory.
- **Conformalization (exact):** compute calibration scores over  $C$  labels ( $O(nC)$ ); APS/RAPS add  $O(C \log C)$  for

sorting), then test set filtering  $O(mC)$ .

**Protocol (joint-pool, transductive).** Given calibration  $\mathcal{D}_{\text{cal}}$  and a batch of  $m$  test queries, form the joint pool of size  $N=n+m$ , build a symmetric  $k$ NN graph on  $\ell_2$ -normalized embeddings, run  $T_{\text{iter}}$  mean-field passes, compute the  $(1-\alpha)$  quantile on the calibration subset, and conformalize the  $m$  queries with this threshold. In our runs we use a fixed budget ( $k=15$ ,  $T_{\text{iter}}=8$ ); time/memory numbers in Table S1 reflect this setting.

**Contrasts to baselines (same backbones/prompts).** SCA-T [10] performs unsupervised entropy minimization on the joint pool (calibration+test), regularized by a label-marginal prior. Its solver operates at the logits level and incurs a per joint-pool complexity of  $O(T'NC)$ , where  $T'$  is the number of optimization steps, followed by standard conformal scoring at  $O(nC)$ .

**Conf-OT** [9] rebalances zero-shot logits using Sinkhorn optimal transport [18] over a  $K \times N$  similarity matrix (with  $K$  calibration shots per class and  $N=n+m$  total items in the joint pool). The dominant cost per joint-pool pass is  $O(SKN)$  for  $S$  Sinkhorn iterations, plus  $O(nC)$  for conformalization. With small  $S$  and  $K$ , the wall-clock overhead remains low.

**FCA** [11] performs full conformal adaptation using labeled calibration data. For each class  $y$ , it fits a linear probe (via SS-Text [11]) in a transductive conformal adaptation loop. Test-time inference entails  $O(C)$  separate refits per joint pool, plus  $O(nC)$  for scoring. Although gradients are avoided by the SS-Text optimizer [11], runtime and memory scale linearly with  $C$ , making FCA less efficient than single-solver black-box methods like **LATA**.

As shown in Table S1, **LATA**'s per-joint-pool cost is dominated by (i) approximate  $k$ NN graph construction on  $\ell_2$ -normalized embeddings and (ii)  $T_{\text{iter}}$  sparse mean-field passes over that graph. Conformalization then adds an exact  $O(nC)$  to compute the calibration quantile and  $O(mC)$  to apply it to the  $m$  queries (with  $N = n+m$  total items in the joint pool). **LATA** requires no gradients, no  $O(C)$  per-class refits, and uses a single deterministic, symmetry-preserving transform on calibration and test, maintaining SCP validity. Compared to SCA-T and Conf-OT, **LATA** avoids dense logits-level optimization or optimal-transport solves, relying instead on lightweight neighbor aggregation with a frozen failure-aware head—while keeping black-box

Table S2. **Sensitivity to failure-aware weights**  $(\lambda, \eta)$  (APS,  $\alpha = 0.10$ , LATA-LF). All configurations remain near the nominal coverage ( $\approx 0.90$ ) and retain clear gains in set size and CCV compared to SCP (Size = 4.05, CCV = 9.59) and SCA-T (Size = 3.35, CCV = 7.18).

| $\lambda$   | $\eta$      | Cov.         | Size ↓ / CCV ↓     |
|-------------|-------------|--------------|--------------------|
| 0.25        | 0.10        | 0.897        | 2.90 / 6.55        |
| 0.25        | 0.25        | 0.898        | 2.88 / 6.40        |
| 0.25        | 0.50        | 0.895        | 2.82 / 6.50        |
| 0.50        | 0.10        | 0.900        | 2.96 / 6.45        |
| <b>0.50</b> | <b>0.25</b> | <b>0.900</b> | <b>2.95 / 6.32</b> |
| 0.50        | 0.50        | 0.898        | 2.88 / 6.35        |
| 1.00        | 0.10        | 0.907        | 3.08 / 6.25        |
| 1.00        | 0.25        | 0.907        | 3.07 / 6.15        |
| 1.00        | 0.50        | 0.905        | 3.00 / 6.20        |

usage and conformal guarantees. Versus FCA, **LATA** removes the cost of repeated per-class refits yet still conformalizes over the full label space without sacrificing coverage.

## D. Additional Ablation Studies

### D.1. Sensitivity to failure-aware weights

We study the robustness of the failure-aware score (Eq. (8) of the main manuscript) by varying the difficulty weight  $\lambda$  and plausibility weight  $\eta$  around our default setting  $(\lambda, \eta) = (0.5, 0.25)$ , while keeping all other hyperparameters fixed (APS,  $\alpha = 0.10$ , **LATA-LF**, averaged over all tasks). Table S2 reports marginal coverage, average set size, and CCV.

Across  $(\lambda, \eta) \in [0.25, 1.0] \times [0.10, 0.50]$ , coverage remains tightly concentrated around 0.90 (max deviation  $\leq 0.01$ ). Larger  $\lambda$  mildly raises coverage and Size while improving CCV (e.g.,  $\lambda: 0.25 \rightarrow 1.0$  at  $\eta=0.10$ : Cov. 0.897  $\rightarrow$  0.907, Size 2.90  $\rightarrow$  3.08, CCV 6.55  $\rightarrow$  6.25). Increasing  $\eta$  tends to shrink sets with negligible impact on coverage, with CCV flat to slightly worse at very high  $\eta$ ; the mid-range  $\eta \approx 0.25$  is strongest. Our default  $(\lambda, \eta) = (0.5, 0.25)$  lies near the center of this Pareto region, offering a robust efficiency–validity balance without task-specific tuning.

### D.2. Sensitivity to Laplacian weight

The hyperparameter  $\gamma$  controls the strength of the graph–smoothness term in Eq. (5) of the main manuscript: small  $\gamma$  keeps the refined distributions close to the zero-shot predictor, while larger values enforce stronger agreement among neighbors on the  $k$ NN graph. We vary  $\gamma \in \{0.20, 0.35, 0.50\}$  for **LATA-LF** (APS,  $\alpha=0.10$ ), keeping all other hyperparameters fixed.

As presented in Table S3, across  $\gamma \in [0.20, 0.50]$ , cover-

Table S3. **Sensitivity to Laplacian weight**  $\gamma$  (APS,  $\alpha=0.10$ , LATA-LF). All settings stay near nominal coverage and retain clear gains in Size/CCV vs. SCP (Size = 4.05, CCV = 9.59) and SCA-T (Size = 3.35, CCV = 7.18).

| $\gamma$    | Cov.         | Size ↓      | CCV ↓       |
|-------------|--------------|-------------|-------------|
| 0.20        | 0.899        | 3.00        | 6.55        |
| <b>0.35</b> | <b>0.900</b> | <b>2.95</b> | <b>6.32</b> |
| 0.50        | 0.901        | 2.98        | 6.30        |

Table S4. **Sensitivity to graph degree**  $k$  (APS,  $\alpha=0.10$ , **LATA-LF**). All settings remain near nominal coverage and maintain clear gains over SCP (Size = 4.05, CCV = 9.59) and SCA-T (Size = 3.35, CCV = 7.18).

| $k$       | Cov.         | Size ↓      | CCV ↓       |
|-----------|--------------|-------------|-------------|
| 10        | 0.899        | 3.02        | 6.60        |
| <b>15</b> | <b>0.900</b> | <b>2.95</b> | <b>6.32</b> |
| 20        | 0.900        | 2.97        | 6.35        |

age remains tightly clustered around the nominal 0.90, and all settings yield substantially smaller, more class-balanced sets than SCP and SCA-T. Variation in efficiency and CCV is mild: weaker smoothing ( $\gamma=0.20$ ) slightly increases CCV, while stronger smoothing ( $\gamma=0.50$ ) produces only marginal changes in Size and CCV. The default  $\gamma=0.35$  provides a robust middle ground; **LATA-LF** does not require task-specific tuning of this parameter to maintain its coverage and fairness gains.

### D.3. Sensitivity to graph degree

The parameter  $k$  controls the sparsity of the image–image  $k$ NN graph: smaller  $k$  yields weaker (more local) smoothing, while larger  $k$  increases connectivity and the strength of transductive propagation. We vary  $k \in \{10, 15, 20\}$  for **LATA-LF** (APS,  $\alpha=0.10$ ), keeping all other hyperparameters fixed.

As shown in Table S4, across  $k \in [10, 20]$ , **LATA-LF** consistently stays near the nominal coverage ( $\approx 0.90$ ) while substantially improving Size and CCV over SCP and SCA-T. Sparser graphs ( $k=10$ ) slightly weaken the smoothing effect, yielding marginally larger sets and higher CCV; denser graphs ( $k=20$ ) produce only tiny changes relative to the default. Overall,  $k=15$  is a robust operating point, and **LATA-LF** does not require task-specific tuning of  $k$  to retain its coverage and fairness gains.

### D.4. Compute–accuracy trade-off

Fig. S1 analyzes **LATA** as we vary the number of mean-field passes  $T_{\text{iter}} \in \{4, 8, 12\}$  at  $\alpha = 0.10$ . Our default choice  $T_{\text{iter}} = 8$  (approximately 0.06 s/img and 0.80 GB) achieves nominal coverage with strong efficiency (APS: size 3.10,

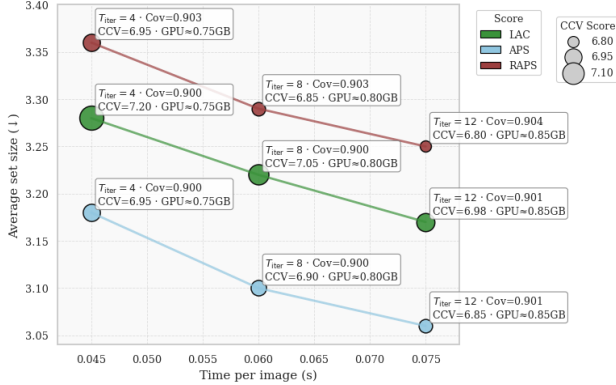

Figure S1. **Compute-accuracy trade-off for LATA** at  $\alpha=0.10$ . Time per image (x-axis) vs. average set size (y-axis) for  $T_{\text{iter}} \in \{4, 8, 12\}$ . Colors denote LAC/APS/RAPS; marker size encodes CCV. Annotations show Cov., CCV, and GPU memory. Default  $T_{\text{iter}}=8$  balances speed and reliability;  $T_{\text{iter}}=4$  is faster with mild trade-offs;  $T_{\text{iter}}=12$  yields limited gains.

CCV 6.90; LAC: 3.22/7.05; RAPS: 3.29/6.85).

Reducing to  $T_{\text{iter}} = 4$  ( $< 0.045$  s/img) speeds up inference by about 25% with a mild increase in Size/CCV (e.g., APS:  $\Delta+0.08$  Size,  $\Delta+0.05$  CCV). Increasing to  $T_{\text{iter}} = 12$  yields only marginal gains (APS: 3.06/6.85). Across scores, APS is the most size-efficient; RAPS attains the lowest CCV and slightly higher coverage ( $\approx 0.903$ ) at the cost of larger sets, while LAC lies between them. Timings were measured on a single RTX 4090 with identical backbones and prompts.

## D.5. Temperature Sensitivity

Conformal inference is closely related to other uncertainty quantification frameworks—particularly calibration. Prior work often incorporates post-hoc calibration techniques such as temperature scaling to sharpen or smooth predictive probabilities before score computation (e.g., [1]). Temperature scaling rescales logits in Eq. (1) of the main manuscript by a factor  $\tau$ , which can change score tails and thus efficiency (average set size) even when coverage remains valid. We therefore assess robustness to  $\tau$  by applying the same scaling to both calibration and test (preserving exchangeability) and measuring conformal sets at  $\alpha=0.10$ .

As shown in Fig. S2, for LAC the size curve is mildly U-shaped with small variation across  $\tau \in [0.6, 1.4]$ . For APS and RAPS, larger  $\tau$  softens distributions and increases set size, as expected. Crucially, **LATA-LF** stays strictly below the Base (SCP) curve across all  $\tau$  while maintaining nominal coverage, indicating that the graph-based refinement is robust to temperature perturbations. We default to  $\tau=1.0$  (main draft) and do not tune  $\tau$  on target domains; performance is stable for  $\tau \in [0.8, 1.2]$ , and compute overhead is

Table S5. **Component ablation (APS)** at  $\alpha \in \{0.10, 0.05\}$ .

| Variant               | ACA $\uparrow$ | $\alpha = 0.10$ |                   |                  | $\alpha = 0.05$ |                   |                  |
|-----------------------|----------------|-----------------|-------------------|------------------|-----------------|-------------------|------------------|
|                       |                | Cov.            | Size $\downarrow$ | CCV $\downarrow$ | Cov.            | Size $\downarrow$ | CCV $\downarrow$ |
| SCP                   | 50.2           | 0.900           | 4.05              | 9.59             | 0.952           | 4.88              | 5.54             |
| <i>u</i> -only        | 50.6           | 0.900           | 3.98              | 9.15             | 0.952           | 4.82              | 5.30             |
| $\alpha$ -only        | 50.8           | 0.900           | 3.55              | 8.80             | 0.952           | 4.62              | 5.15             |
| <b>LATA (no ViLU)</b> | 55.6           | 0.900           | 3.05              | 6.60             | 0.954           | 3.88              | 3.70             |
| <b>LATA (ours)</b>    | <b>57.1</b>    | <b>0.900</b>    | <b>2.95</b>       | <b>6.32</b>      | <b>0.954</b>    | <b>3.78</b>       | <b>3.55</b>      |

Table S6. **Sensitivity to the label-informed prior ( $\beta$ )**. We apply the prior as  $q \leftarrow \text{Renorm}(q \odot m^\beta)$  (equivalently, logits  $z \leftarrow z + \beta \log m$ ), where  $m$  are Dirichlet-smoothed calibration marginals (fixed once) and the same transform is applied to calibration and test. Numbers are averaged across tasks.

| $\beta$ | ACA $\uparrow$ | LAC, $\alpha=0.10$ |                   |                  | LAC, $\alpha=0.05$ |                   |                  |
|---------|----------------|--------------------|-------------------|------------------|--------------------|-------------------|------------------|
|         |                | Cov.               | Size $\downarrow$ | CCV $\downarrow$ | Cov.               | Size $\downarrow$ | CCV $\downarrow$ |
| 0.0     | 57.0           | 0.900              | <b>3.07</b>       | 6.40             | 0.952              | <b>3.76</b>       | <b>3.35</b>      |
| 0.1     | 57.2           | 0.905              | 3.11              | 6.32             | 0.958              | 3.82              | 3.40             |
| 0.2     | <b>57.4</b>    | <b>0.910</b>       | 3.15              | <b>6.25</b>      | <b>0.962</b>       | 3.86              | 3.40             |
| 0.3     | 57.4           | 0.914              | 3.20              | 6.22             | 0.966              | 3.92              | 3.45             |

Table S7. **Prior sensitivity for APS**. Same prior application and setup as Table S6.

| $\beta$ | ACA $\uparrow$ | APS, $\alpha=0.10$ |                   |                  | APS, $\alpha=0.05$ |                   |                  |
|---------|----------------|--------------------|-------------------|------------------|--------------------|-------------------|------------------|
|         |                | Cov.               | Size $\downarrow$ | CCV $\downarrow$ | Cov.               | Size $\downarrow$ | CCV $\downarrow$ |
| 0.0     | 57.1           | 0.900              | <b>2.95</b>       | 6.32             | 0.954              | <b>3.78</b>       | 3.55             |
| 0.1     | 57.3           | 0.905              | 2.99              | 6.28             | 0.959              | 3.83              | 3.50             |
| 0.2     | <b>57.5</b>    | <b>0.910</b>       | 3.03              | <b>6.25</b>      | <b>0.963</b>       | 3.88              | <b>3.45</b>      |
| 0.3     | 57.5           | 0.914              | 3.08              | 6.23             | 0.966              | 3.93              | 3.44             |

unaffected by  $\tau$ .

## D.6. Component analysis

The APS ablation in Table S5 mirrors the LAC trend: **LATA** without ViLU [4] already secures most of the coverage-efficiency gains (Size 3.05, CCV 6.60 at  $\alpha=0.10$ ), and the full **LATA (ours)** variant delivers the strongest results while keeping coverage at nominal. The *u* and  $\alpha$  terms provide complementary benefits—*u* reduces CCV with minimal size change, whereas  $\alpha$  shrinks sets modestly—yet their combination with the graph refinement yields the best overall trade-off.

## D.7. Sensitivity to label-informed prior

The label-informed prior  $\beta$  serves as a gentle coverage-efficiency knob. As shown in Table S6 and Table S7, increasing  $\beta$  tightens marginal coverage with a small increase in set size. CCV improves for LAC at  $\alpha=0.10$  and for APS at both error levels, while for LAC at  $\alpha=0.05$

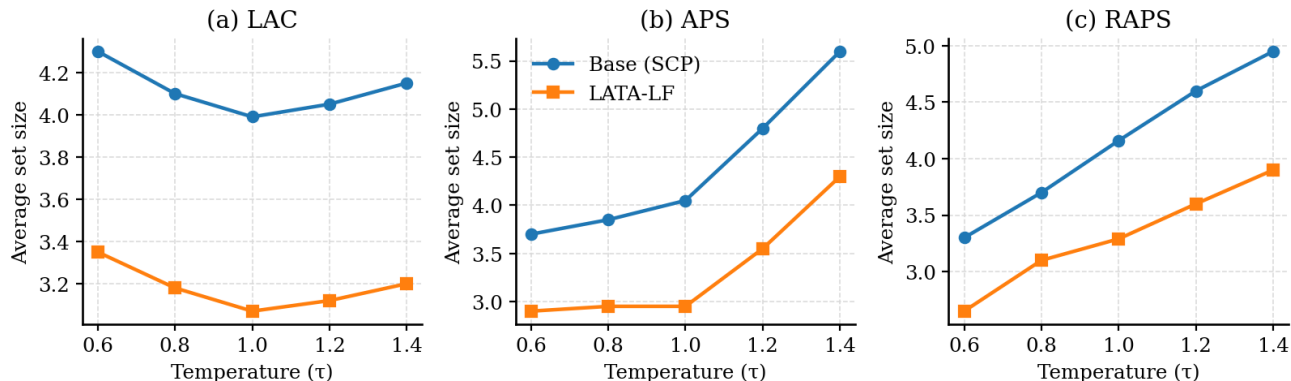

Figure S2. **Temperature sensitivity** at  $\alpha=0.10$ . Average set size versus temperature for LAC, APS, and RAPS under Base (SCP) and **LATA-LF**. **LATA-LF** preserves nominal coverage and remains strictly more efficient than Base across  $\tau \in [0.6, 1.4]$ .

the fairness gains are neutral or slightly negative due to the tighter target. We therefore report **LATA-LF** ( $\beta=0$ ) as the default and **LATA-LI** ( $\beta=0.2$ ) as a practical, validity-preserving variant; the prior is applied once and identically to calibration and test, preserving exchangeability.

### D.8. ViLU pretraining source

In Table S8, we ablate the source domain used to pretrain the frozen ViLU head that provides the difficulty  $u(x)$  and plausibility  $\alpha(x)$  signals in the failure-aware score (Eq. (8), main manuscript). *Matched ViLU* denotes a head pretrained on data with the *same modality and label granularity* as the target task (e.g., histopathology for SICAPv2), while *Mismatched ViLU* is pretrained on a *different* modality/dataset family (e.g., chest X-ray). *No ViLU* disables these signals by setting  $(\lambda, \eta) = (0, 0)$ . Under a fixed unsupervised transductive (UT) setup ( $N=256$ ,  $k=15$ ,  $T_{\text{iter}}=8$ ), and LAC at  $\alpha=0.10$ , **coverage remains nominal** in all cases. *Matched ViLU* achieves the **smallest sets** and **lowest CCV**; using a mismatched source causes only a small efficiency/fairness drift ( $\sim+0.05$  size,  $\sim+0.12$  CCV), while removing ViLU has a clearer impact ( $\sim+0.15$  size,  $\sim+0.50$  CCV) at identical compute. Unless otherwise stated, we use the default weights  $(\lambda, \eta) = (0.5, 0.25)$  and  $\beta=0$  (**LATA-LF**).

Table S8. **Effect of ViLU pretraining source** (LAC,  $\alpha=0.10$ ). UT window:  $N=256$ ,  $k=15$ ,  $T_{\text{iter}}=8$ ; averaged over random seeds.

| Setting                                         | Cov.  | Size↓       | CCV↓        | T (s/img) / GPU (GB) |
|-------------------------------------------------|-------|-------------|-------------|----------------------|
| <b>LATA (ours)</b> (matched ViLU)               | 0.900 | <b>3.07</b> | <b>6.40</b> | 0.05 / 0.80          |
| <b>LATA (ours)</b> (mismatched ViLU)            | 0.900 | 3.12        | 6.52        | 0.05 / 0.80          |
| <b>LATA (ours)</b> (no ViLU: $\lambda=\eta=0$ ) | 0.900 | 3.22        | 6.90        | 0.05 / 0.80          |

### D.9. Resource-aware gating

We study a simple speed–memory knob that skips the mean-field/CCCP refinement for *easy* inputs, identified by a low ViLU risk  $u(x)$ . Specifically, for any  $x$  with  $u(x) < \tau_u$ , we bypass the update in Eq. (6) of the main manuscript and pass the base probabilities through unchanged (i.e.,  $\tilde{z}(x) = q(x)$  after any fixed prior bias), while applying the standard refinement to the remaining samples. The gating rule is applied *identically* to calibration and test, preserving exchangeability and split-conformal validity.

Table S9 reports results under our fixed UT setup ( $N=256$ ,  $k=15$ ,  $T_{\text{iter}}=8$ ), using LAC at  $\alpha=0.10$ . Increasing  $\tau_u$  reduces compute (time  $\downarrow 10\text{--}20\%$ , GPU  $\downarrow 12.5\text{--}18.8\%$ ) while maintaining nominal coverage and inducing only modest changes in Size/CCV.

Table S9. **Resource-aware  $u$ -gating under LATA (ours)** (LAC,  $\alpha=0.10$ ). Averaged over random seeds; UT:  $N=256$ ,  $k=15$ ,  $T_{\text{iter}}=8$ . We skip CCCP updates for inputs with  $u(x) < \tau_u$ . Raising  $\tau_u$  lowers time/memory (e.g.,  $\tau_u=0.30$ : T  $-20\%$ , GPU  $-18.8\%$ ) with **no coverage loss**.

| $\tau_u$         | Cov.  | Size↓       | CCV↓        | T (s/img) / GPU (GB) |
|------------------|-------|-------------|-------------|----------------------|
| 0.00 (no gating) | 0.900 | <b>3.07</b> | <b>6.40</b> | 0.050 / 0.80         |
| 0.20             | 0.900 | 3.12        | 6.48        | 0.045 / 0.70         |
| 0.30             | 0.900 | 3.16        | 6.55        | 0.040 / 0.65         |

## E. Additional Qualitative Results

**Qualitative comparison with FCA on Gleason grading.** Fig. S3 contrasts FCA [11] and **LATA (ours)** on SICAPv2 Gleason grading (APS,  $\alpha=0.10$ ), showing per-grade set-size distributions (top) and class co-occurrence within prediction sets (bottom). Both methods behave sensibly—extreme grades NC/G5 are mostly singletons—yet **LATA (ours)** consistently shifts probability

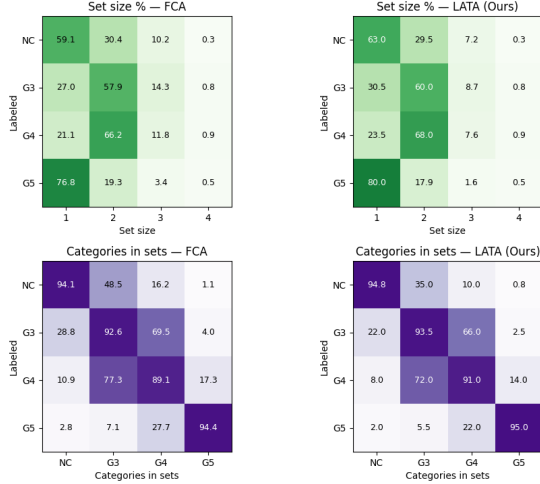

Figure S3. **Qualitative comparison of prediction sets on Gleason grading** (SICAPv2, APS,  $\alpha=0.10$ ). **LATA (ours)** produces smaller sets than FCA—especially for ambiguous G3/G4—while preserving strong diagonals and clinically plausible adjacency (G3 $\leftrightarrow$ G4) and further suppressing unlikely NC $\leftrightarrow$ G5 co-occurrences.

mass from large to small sets, especially for the ambiguous mid-grades G3/G4 (e.g., size-3 frequency drops from roughly 14–12% with FCA to 9–8% with **LATA (ours)**). In the co-occurrence maps, **LATA (ours)** maintains strong diagonals (NC/G3/G5  $\geq 95\%$ , G4  $\approx 91\%$ ) and preserves clinically plausible adjacency (frequent G3 $\leftrightarrow$ G4 co-appearance), while further suppressing *far* pairs such as NC $\leftrightarrow$ G5 and G3/G4 $\leftrightarrow$ G5 compared to FCA. Overall, **LATA (ours)** produces more selective, adjacency-focused uncertainty—smaller sets and reduced spurious co-occurrences—while retaining the grading structure captured by FCA.

**Coverage analysis across datasets.** Fig. S4 and Fig. S5 show that **LATA** stays closest to the nominal target ( $1 - \alpha$ ) while yielding compact sets across all nine datasets (LAC,  $\alpha=0.10$ ). In Fig. S4, **LATA**’s distributions are tightly concentrated at or slightly to the right of the dashed line (validity with low dispersion), whereas SCP is roughly centered but wider (higher CCV), and Adapt+SCP is systematically left-shifted (under-coverage), most visibly on *SICAPv2*, *MMAC*, and *COVID*. SCA-T narrows dispersion relative to SCP but remains broader and slightly left-biased compared to **LATA**. Fig. S5 corroborates this: across datasets, **LATA** occupies the desirable top-left frontier—matching or exceeding target coverage with smaller sets than SCP/SCA-T and without the exchangeability violation of Adapt+SCP. Notably, on long-tailed *NIH* it reduces set size substantially while keeping coverage near 0.91–0.93; on *CheXpert*, *MES-SIDOR*, and *FIVES* it attains high coverage with sets around

1–2; and on the harder *COVID* shift it pulls coverage back toward the target with markedly smaller sets. Overall, these figures illustrate the same trend: **LATA** improves efficiency and class-wise balance while remaining reliably on target.

## F. Scoring Rules, Evaluation Metrics, and Dataset Details

**Setup and notation.** Let  $\mathcal{D}_{\text{cal}} = \{(x_i, y_i)\}_{i=1}^n$  be the labeled calibration split and  $\mathcal{D}_{\text{test}} = \{x_j\}_{j=1}^m$  the unlabeled test pool; assume exchangeability. Let  $z(x) \in \Delta^{C-1}$  denote the class-probability vector used for conformal scoring (either zero-shot  $q(x)$  or **LATA**-refined  $\tilde{z}(x)$ ). A nonconformity score  $S(x, y) \in \mathbb{R}$  quantifies how incompatible label  $y$  is for input  $x$  (*larger is worse*). The global threshold  $\hat{s}$  is the split-conformal  $(1 - \alpha)$  quantile defined in Eq. (2) of the main manuscript. Given the threshold  $\hat{s}$  computed from the calibration set, the prediction set for a test input  $x$  is defined as  $\mathcal{C}(x) = \{y \in 1, \dots, C : S(x, y) \leq \hat{s}\}$ . For each input  $x$ , let  $\pi_x$  denote the permutation that sorts the score vector  $z(x)$  in descending order, and let  $\text{rank}_x(y) \in 1, \dots, C$  represent the rank position of label  $y$  under this ordering.

**Least-Ambiguous Classifier (LAC).** LAC [7] constructs conformal prediction sets by ranking class probabilities and selecting the most confident labels up to a fixed threshold. The underlying nonconformity score is defined as:

$$S_{\text{LAC}}(x, y) = 1 - z_y(x), \quad (1)$$

where  $z_y(x)$  denotes the softmax probability assigned to class  $y$  for input  $x$ . When model probabilities are well-calibrated, high-probability labels yield small scores, producing compact sets at fixed coverage. However, it lacks adaptivity to class imbalance or distributional uncertainty.

**Adaptive Prediction Sets (APS).** To improve adaptiveness over fixed-threshold methods like LAC, APS [6] constructs prediction sets by accumulating probability mass over the most likely classes. The nonconformity score for a label  $y$  is defined as:

$$S_{\text{APS}}(x, y) = \sum_{j: \text{rank}_x(j) < \text{rank}_x(y)} z_j(x) + U \cdot z_y(x), \quad (2)$$

where  $z_j(x)$  is the softmax probability of class  $j$ , and  $U \sim \text{Unif}[0, 1]$  introduces randomization to ensure exact finite-sample coverage in the presence of ties. For deterministic behavior,  $U$  can be fixed to 1. The score reflects the cumulative mass of all labels more confident than  $y$ , plus a fraction of  $y$ ’s own score. Thus, hard or ambiguous examples—where probability is spread across many labels—receive higher scores and larger prediction sets, improving adaptation to uncertainty and class imbalance.

**Regularized Adaptive Prediction Sets (RAPs).** While APS improves class-wise coverage over LAC by adapting to uncertainty, it can lead to overly large prediction

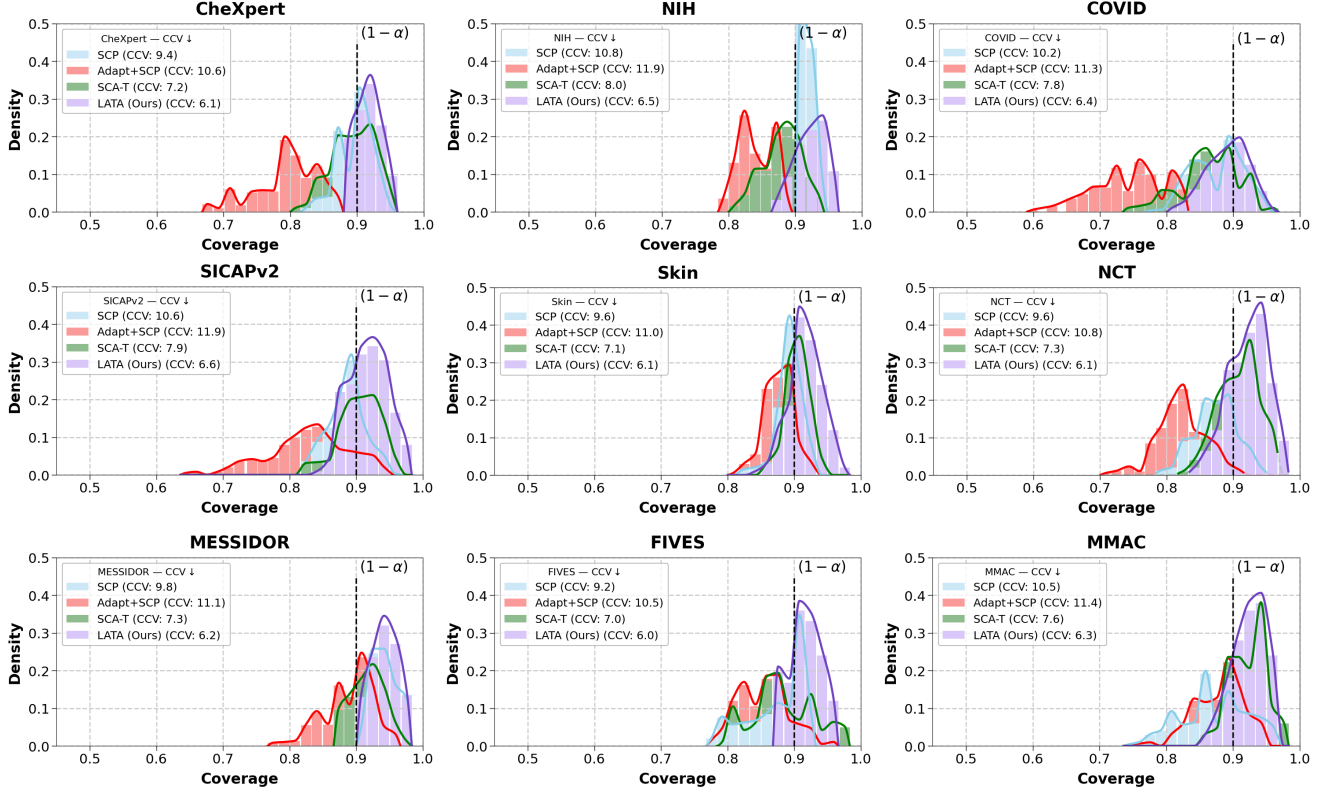

Figure S4. **Coverage analysis** under LAC at  $\alpha = 0.10$ . The dashed line indicates the nominal coverage level. **LATA (ours)** consistently achieves coverage closest to the target across all datasets.

sets—particularly in ambiguous examples. RAPS [1] addresses this by introducing a soft penalty on including lower-ranked classes beyond a fixed cutoff. The nonconformity score is defined as:

$$\begin{aligned} \mathcal{S}_{\text{RAPS}}(x, y) = & \sum_{j: \text{rank}_x(j) < \text{rank}_x(y)} z_j(x) \\ & + \gamma_{\text{RAPS}} \cdot \max\{0, \text{rank}_x(y) - k_{\text{reg}}\} \\ & + U \cdot z_y(x), \end{aligned} \quad (3)$$

where  $\gamma_{\text{RAPS}}$  controls the regularization strength,  $k_{\text{reg}}$  specifies the rank threshold after which penalties are applied, and  $U \sim \text{Unif}[0, 1]$  enables randomized tie-breaking as in APS. The term  $\max\{0, \text{rank}_x(y) - k_{\text{reg}}\}$  penalizes including labels with low confidence (i.e., high rank), effectively taming the tail of the score distribution. This regularization helps balance the trade-off between prediction set size and adaptivity across subgroups.

**Coverage and set size.** To evaluate the reliability and efficiency of conformal prediction, we compute two standard metrics on a labeled test set  $\{(x_i, y_i)\}_{i=1}^{n_{\text{test}}}$ .

The *empirical coverage* measures the proportion of test instances for which the true label is contained in the predic-

tion set:

$$\text{Cov} = \frac{1}{n_{\text{test}}} \sum_{i=1}^{n_{\text{test}}} \mathbb{1}\{y_i \in \mathcal{C}(x_i)\}, \quad (4)$$

where  $\mathbb{1}\{\cdot\}$  is the indicator function. A conformal method satisfies marginal validity if  $\text{Cov} \approx 1 - \alpha$ .

The *average set size*, also referred to as inefficiency, quantifies the expected number of labels returned per prediction:

$$\text{Size} = \frac{1}{n_{\text{test}}} \sum_{i=1}^{n_{\text{test}}} |\mathcal{C}(x_i)|. \quad (5)$$

Smaller prediction sets imply higher efficiency, provided that coverage remains close to the target level. Together, these metrics characterize the trade-off between reliability and compactness of the output sets.

**ACA (Balanced Accuracy).** Balanced accuracy, also known as classwise or macro accuracy, evaluates how well the model performs across all classes irrespective of imbalance. Let  $n_c = |\{i : y_i = c\}|$  be the number of test samples in class  $c$ . Then, ACA is defined as:

$$\text{ACA} = \frac{1}{C} \sum_{c=1}^C \frac{1}{n_c} \sum_{i: y_i=c} \mathbb{1}\left\{ \arg \max_j z_j(x_i) = c \right\}, \quad (6)$$

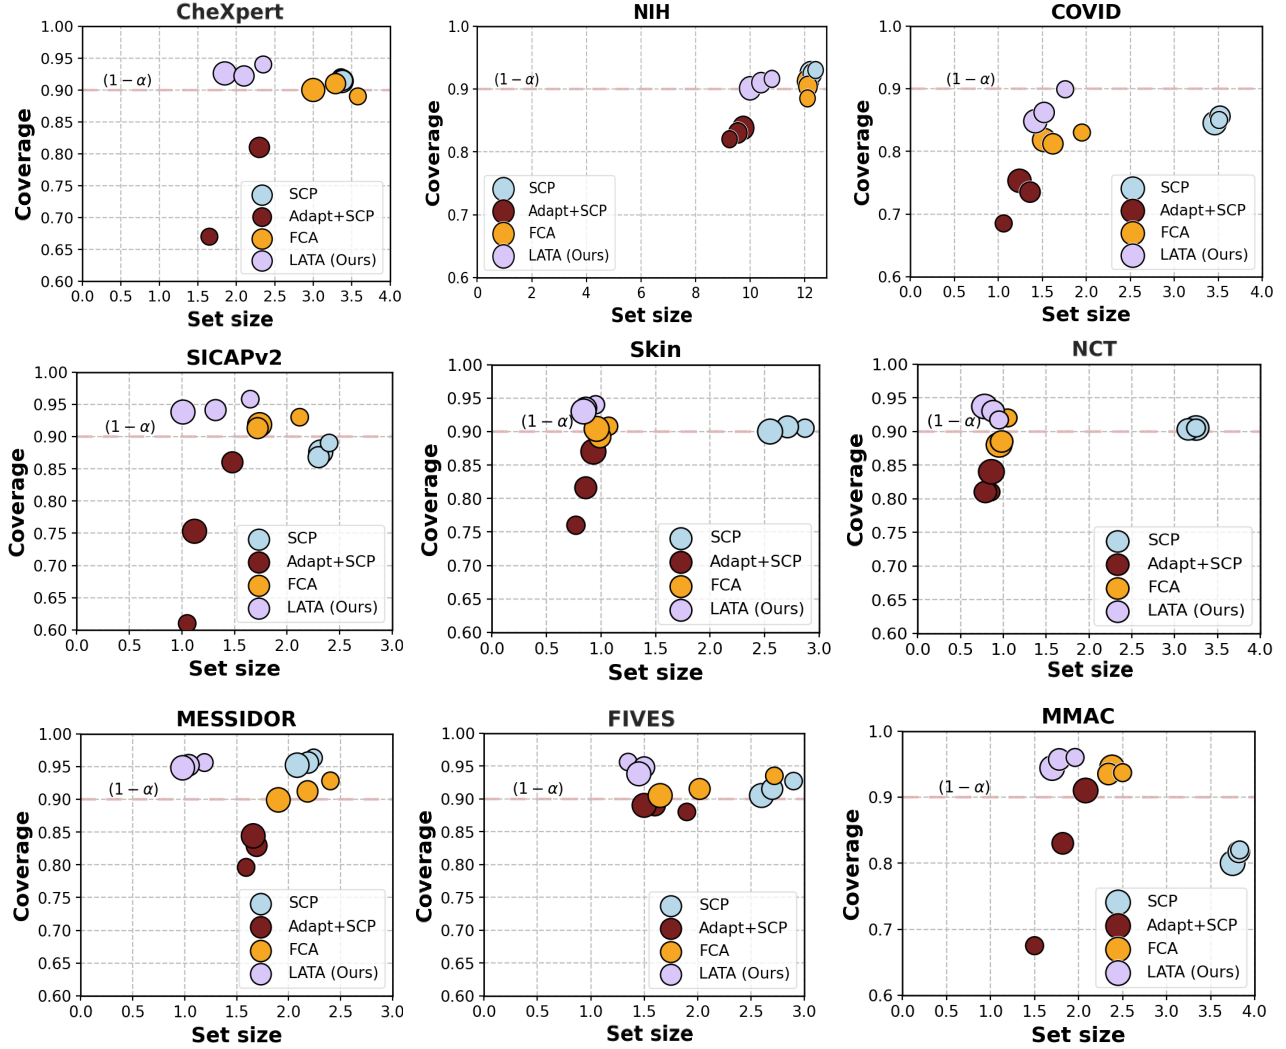

Figure S5. **Conformal prediction results across datasets** using  $\alpha = 0.10$  and LAC [7]. Each point represents a performance, with bubble size indicating the number of adaptation shots  $K \in \{4, 8, 16\}$ .

where  $z_j(x_i)$  is the predicted confidence for class  $j$  on sample  $x_i$ . This metric treats all classes equally, making it well-suited for imbalanced settings.

**CCV (Class-Conditioned Coverage Gap).** To assess how well conformal prediction methods balance coverage across different classes, we compute the classwise empirical coverage:

$$\widehat{\text{Cov}}_c = \frac{1}{n_c} \sum_{i: y_i=c} \mathbb{1}\{y_i \in \mathcal{C}(x_i)\}, \quad (7)$$

and define the class-conditioned coverage gap (CCV) as:

$$\widehat{\text{CCV}} = \frac{1}{C} \sum_{c=1}^C \left| \widehat{\text{Cov}}_c - (1 - \alpha) \right|. \quad (8)$$

This metric captures the average deviation from the target

coverage  $(1 - \alpha)$  across all classes. A lower  $\widehat{\text{CCV}}$  indicates more uniform and fair coverage, with  $\widehat{\text{CCV}} = 0$  signifying perfect per-class alignment with the coverage goal.

In all experiments, the predicted class-probability vector is denoted by  $z(x)$ . Under **LATA**, we use its transitively refined version  $\tilde{z}(x)$ ; otherwise we use the raw model output  $q(x)$ . The same deterministic transformation (e.g., **LATA** smoothing) is applied to both calibration and test samples, preserving exchangeability.

**Dataset details.** For all datasets and experiments, we adopt the dataset preparation protocol and train/calibration/test splits provided in the FCA codebase [11].

## References

- [1] Anastasios Angelopoulos, Stephen Bates, Jitendra Malik, and Michael I Jordan. Uncertainty sets for image classifiers using conformal prediction. arXiv preprint arXiv:2009.14193, 2020. 1, 4, 7
- [2] Alex Gammerman, Volodya Vovk, and Vladimir Vapnik. Learning by transduction. arXiv preprint arXiv:1301.7375, 2013. 1
- [3] Yunshi Huang, Fereshteh Shakeri, Jose Dolz, Malik Boudiaf, Houda Bahig, and Ismail Ben Ayed. Lp++: A surprisingly strong linear probe for few-shot clip. In Proceedings of the IEEE/CVF Conference on Computer Vision and Pattern Recognition, pages 23773–23782, 2024. 1
- [4] Marc Lafon, Yannis Karmim, Julio Silva-Rodríguez, Paul Couairon, Clément Rambour, Raphaël Fournier S’niehotta, Ismail Ben Ayed, Jose Dolz, and Nicolas Thome. ViLU: Learning Vision-Language Uncertainties for Failure Prediction. International Conference on Computer Vision (ICCV 2025), 2025. 4
- [5] Harris Papadopoulos, Kostas Proedrou, Volodya Vovk, and Alex Gammerman. Inductive confidence machines for regression. In European conference on machine learning, pages 345–356. Springer, 2002. 1
- [6] Yaniv Romano, Matteo Sesia, and Emmanuel Candes. Classification with valid and adaptive coverage. Advances in neural information processing systems, 33:3581–3591, 2020. 1, 6
- [7] Mauricio Sadinle, Jing Lei, and Larry Wasserman. Least ambiguous set-valued classifiers with bounded error levels. Journal of the American Statistical Association, 114(525): 223–234, 2019. 1, 6, 8
- [8] Julio Silva-Rodríguez, Sina Hajimiri, Ismail Ben Ayed, and Jose Dolz. A closer look at the few-shot adaptation of large vision-language models. In Proceedings of the IEEE/CVF Conference on Computer Vision and Pattern Recognition, pages 23681–23690, 2024. 1
- [9] Julio Silva-Rodríguez, Ismail Ben Ayed, and Jose Dolz. Conformal prediction for zero-shot models. In Proceedings of the Computer Vision and Pattern Recognition Conference, pages 19931–19941, 2025. 1, 2
- [10] Julio Silva-Rodríguez, Ismail Ben Ayed, and Jose Dolz. Trustworthy few-shot transfer of medical vlms through split conformal prediction. In International Conference on Medical Image Computing and Computer-Assisted Intervention, pages 658–668. Springer, 2025. 2
- [11] Julio Silva-Rodríguez, Leo Fillioux, Paul-Henry Cournède, Maria Vakalopoulou, Stergios Christodoulidis, Ismail Ben Ayed, and Jose Dolz. Full conformal adaptation of medical vision-language models. In International Conference on Information Processing in Medical Imaging, pages 278–293. Springer, 2025. 2, 5, 8
- [12] Vladimir Vovk. Conditional validity of inductive conformal predictors. In Asian conference on machine learning, pages 475–490. PMLR, 2012. 1
- [13] Vladimir Vovk, Alexander Gammerman, and Glenn Shafer. Algorithmic learning in a random world. Springer, 2005. 1
- [14] Hantao Yao, Rui Zhang, and Changsheng Xu. Visual-language prompt tuning with knowledge-guided context optimization. In Proceedings of the IEEE/CVF conference on computer vision and pattern recognition, pages 6757–6767, 2023. 1
- [15] Alan L Yuille and Anand Rangarajan. The concave-convex procedure (cccp). Advances in neural information processing systems, 14, 2001. 2
- [16] Maxime Zanella, Benoît Gérin, and Ismail Ayed. Boosting vision-language models with transduction. Advances in Neural Information Processing Systems, 37:62223–62256, 2024. 1
- [17] Kaiyang Zhou, Jingkang Yang, Chen Change Loy, and Ziwei Liu. Learning to prompt for vision-language models. International Journal of Computer Vision, 130(9):2337–2348, 2022. 1
- [18] Hao Zhu and Piotr Koniusz. Ease: Unsupervised discriminant subspace learning for transductive few-shot learning. In Proceedings of the IEEE/CVF conference on computer vision and pattern recognition, pages 9078–9088, 2022. 2
